# Supplementary material for: Ocular abnormalities in a large patient cohort with retinitis pigmentosa in Western China
Source: PubMed Central journal article supplement (PMC7812647; doi:10.1186/s12886-020-01797-z), 2021-01-18
Supplement: 12886_2020_1797_MOESM1_ESM.pdf [file 12886_2020_1797_MOESM1_ESM.pdf]

**Supplemental Table 1** The BCVA in the study cohort of patients with retinitis pigmentosa stratifying by sex

|                   | <b>Overall<br/>(n=1065)</b> | <b>Female<br/>(n=493)</b> | <b>Male<br/>(n=572)</b> | $\chi^2$ | <i>P</i> value |
|-------------------|-----------------------------|---------------------------|-------------------------|----------|----------------|
| <b>Normal</b>     | 541 (50.8%)                 | 262 (53.1%)               | 279 (48.8%)             |          |                |
| <b>Low vision</b> | 220 (20.7%)                 | 93 (18.9%)                | 127 (22.2%)             | 2.521    | 0.283          |
| <b>Blindness</b>  | 304 (28.5%)                 | 138 (28.0%)               | 166 (29%.0)             |          |                |
