# Supplementary material for: Ocular abnormalities in a large patient cohort with retinitis pigmentosa in Western China
Source: PubMed Central journal article supplement (PMC7812647; doi:10.1186/s12886-020-01797-z), 2021-01-18
Supplement: 12886_2020_1797_MOESM2_ESM.pdf [file 12886_2020_1797_MOESM2_ESM.pdf]

**Supplemental Table 2** The BCVA in the study cohort of patients with retinitis pigmentosa stratifying by age

|                   | <b>Overall<br/>(n=1065)</b> | <b>≤15years<br/>(n=61)</b> | <b>16-44years<br/>(n=489)</b> | <b>45-64years<br/>(n=433)</b> | <b>≥65years<br/>(n=73)</b> | $\chi^2$ | <b>P value</b> |
|-------------------|-----------------------------|----------------------------|-------------------------------|-------------------------------|----------------------------|----------|----------------|
| <b>Normal</b>     | 541 (50.8%)                 | 36 (59.0%)                 | 287 (57.6%)                   | 195 (45.0%)                   | 23 (31.5%)                 |          |                |
| <b>Low vision</b> | 220 (20.7%)                 | 16 (26.2%)                 | 98 (19.7%)                    | 88 (20.3%)                    | 18 (24.7%)                 | 36.956   | <0.001         |
| <b>Blindness</b>  | 304 (28.5%)                 | 9 (14.8%)                  | 113 (22.7%)                   | 150 (34.6%)                   | 32 (43.8%)                 |          |                |
