# Supplementary material for: Ocular abnormalities in a large patient cohort with retinitis pigmentosa in Western China
Source: PubMed Central journal article supplement (PMC7812647; doi:10.1186/s12886-020-01797-z), 2021-01-18
Supplement: 12886_2020_1797_MOESM3_ESM.pdf [file 12886_2020_1797_MOESM3_ESM.pdf]

**Supplemental Table 3** Classification of macular abnormalities in the study cohort of patients with retinitis pigmentosa stratifying by sex

|            | Overall          |                     | Male            |                     | Female          |                     | $\chi^2$ | P value |
|------------|------------------|---------------------|-----------------|---------------------|-----------------|---------------------|----------|---------|
|            | Eyes<br>(n=1388) | Patients<br>(n=704) | Eyes<br>(n=706) | Patients<br>(n=357) | Eyes<br>(n=682) | Patients<br>(n=347) |          |         |
| <b>ERM</b> | 709(51.1%)       | 418(59.4%)          | 393 (55.7%)     | 230 (64.4%)         | 316 (46.3%)     | 188 (54.2%)         | 7.660    | 0.006*  |
| <b>CME</b> | 255(18.4%)       | 150 (21.3%)         | 118 (16.7%)     | 69 (19.3%)          | 137 (20.1%)     | 81 (23.3%)          | 1.692    | 0.193   |
| <b>MH</b>  | 32 (2.3%)        | 26 (3.7%)           | 16 (2.3%)       | 11 (3.1%)           | 16 (2.3%)       | 15 (4.3%)           | 0.763    | 0.383   |
| <b>VMT</b> | 33(2.4%)         | 25 (3.6%)           | 21 (3.0%)       | 16 (4.5%)           | 12 (1.8%)       | 9 (2.6%)            | 1.832    | 0.176   |

ERM epiretinal membrane, CME cystoid macular oedema, MH macular hole, VMT vitreomacular traction syndrome

(\*)=Significant values
