# Supplementary material for: Ocular abnormalities in a large patient cohort with retinitis pigmentosa in Western China
Source: PubMed Central journal article supplement (PMC7812647; doi:10.1186/s12886-020-01797-z), 2021-01-18
Supplement: 12886_2020_1797_MOESM5_ESM.pdf [file 12886_2020_1797_MOESM5_ESM.pdf]

**Supplemental Table 5** Classification of macular abnormalities in the study cohort of patients with retinitis pigmentosa stratifying by lens status

|            | <b>Overall<br/>(n=1388)</b> | <b>Cataract<br/>(n=461)</b> | <b>Clear Lens<br/>(n=808)</b> | <b>Pseudophakic and aphakia<br/>(n=119)</b> | $\chi^2$ | <b>P value</b> |
|------------|-----------------------------|-----------------------------|-------------------------------|---------------------------------------------|----------|----------------|
| <b>ERM</b> | 709 (51.1%)                 | 270 (58.6%)                 | 368 (45.5%)                   | 71 (59.7%)                                  | 23.762   | <0.001*        |
| <b>CME</b> | 255 (18.4%)                 | 99 (21.5%)                  | 134 (16.6%)                   | 22 (18.5%)                                  | 4.683    | 0.096          |
| <b>MH</b>  | 32 (2.3%)                   | 20 (4.3%)                   | 9 (1.1%)                      | 3 (2.5%)                                    | 13.577   | 0.001*         |
| <b>VMT</b> | 33 (2.4%)                   | 17 (3.7%)                   | 10 (1.2%)                     | 6 (5.0%)                                    | 11.573   | 0.003*         |

ERM epiretinal membrane, CME cystoid macular oedema, MH macular hole, VMT vitreomacular traction syndrome

(\*)=Significant values
